# Supplementary material for: Antitumor activity of a potent MEK inhibitor, TAK-733, against colorectal cancer cell lines and patient derived xenografts
Source: PubMed Central journal article supplement (PMC4741473; doi:10.18632/oncotarget.5949), 2015-10-01
Supplement: oncotarget-06-34561-s001.pdf [file oncotarget-06-34561-s001.pdf]

## Antitumor activity of a potent MEK inhibitor, TAK-733, against colorectal cancer cell lines and patient derived xenografts

### Supplementary Material

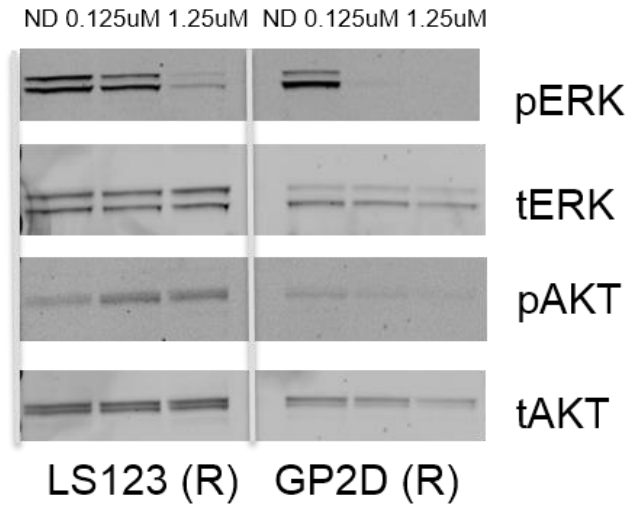

**Supplemental Figure 1.** Effect of TAK-733 was evaluated on downstream effectors in two TAK-733-resistant cell lines with one cell line (LS123) showing an increase in p-AKT.
